# Supplementary material for: Meldonium Inhibits Cell Motility and Wound-Healing in Trabecular Meshwork Cells and Scleral Fibroblasts: Possible Applications in Glaucoma
Source: MDPI journal article supplement (doi:10.3390/ph16040594), 2023-04-15
Supplement: s1 [file s1]

## Supporting Information

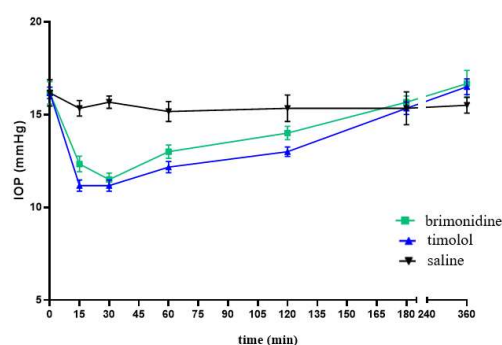

Figure S1. Effect of timolol and brimonidine eye drops on baseline IOP in rats. In each rat (n = 3; 6 eyes) eye drops (10  $\mu$ l) were instilled in each eye. SE bars are shown. \*\*\* p<0.001 (15'-30') \*\* p<0.01 (60') vs saline control.

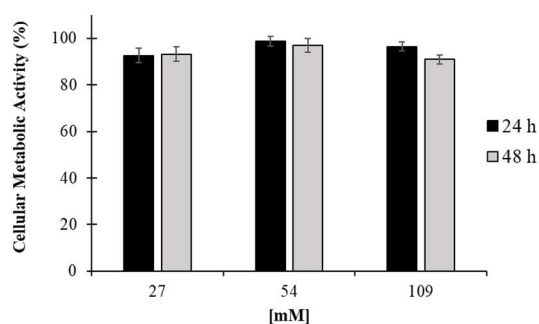

Figure S2. Cell viability (MTT assay) of HSF treated with increasing concentrations of MID for 24 and 48 h in complete culture medium (2% FCS). Data are expressed as means  $\pm$  S.D. of three independent experiments, each performed in triplicate.
